# Supplementary material
Source: PubMed Central journal article supplement (PMC4592451)
Supplement: NIHMS710491-supplement-1.pdf [file NIHMS710491-supplement-1.pdf]

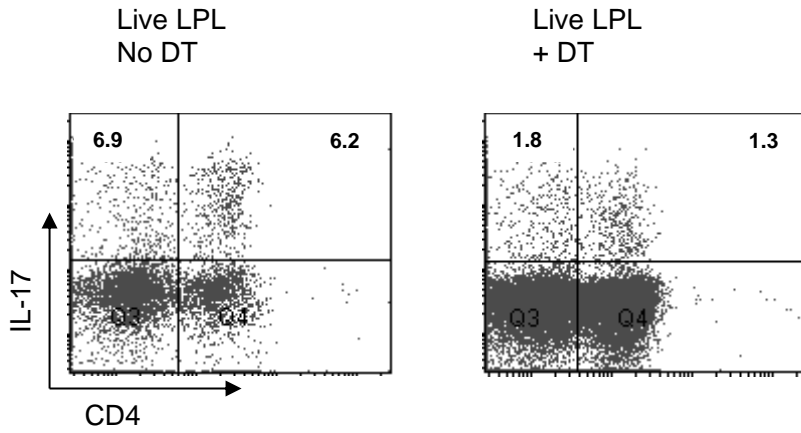

**Supplemental Figure 1: Mitigation of IL-17 response to ETBF in absence of Tregs is not restricted to CD4+ (Th17) cells.**

B6.Foxp3DTR mice were inoculated with ETBF. Either 150  $\mu$ l purified sterile H<sub>2</sub>O or 50 ng/g DT was administered ip on days -2, -1, 1, 3, & 5. Colonic LPLs from each mouse were harvested on day 7. Cells were stimulated ex vivo, followed by ICS. Dot plots show viable LPLs from 1 mouse per group and are representative of 2 experiments.
