# Supplementary material
Source: PubMed Central journal article supplement (PMC4592451)
Supplement: NIHMS710491-supplement-2.pdf [file NIHMS710491-supplement-2.pdf]

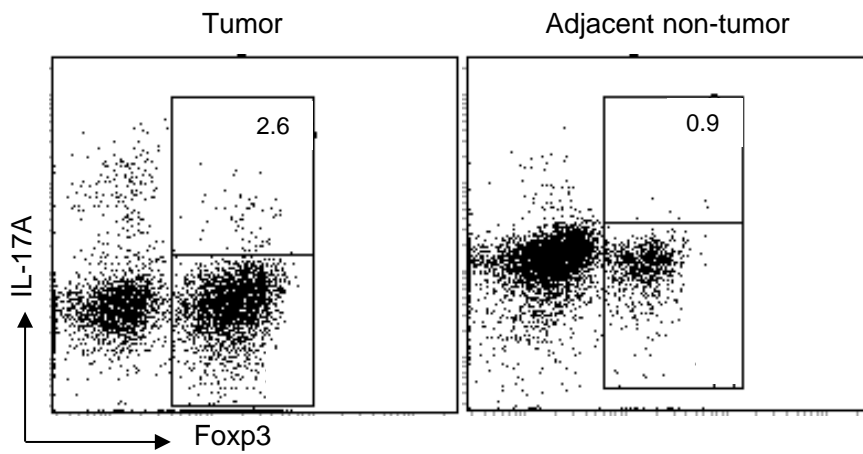

**Supplemental Figure 2: IL-17+ Foxp3+ Tregs infiltrate ETBF-infected colons.**

Min mice were inoculated with ETBF on day 0. At 10 weeks, colonic LPLs were harvested from colon tumors (left) and adjacent non-tumor colon tissue (right). Cells were stimulated ex vivo, followed by ICS. Dot plots show viable CD4+ LPLs. Percentage of IL-17+ within Foxp3+ gate is indicated.
